# Supplementary material
Source: ML conference proceedings conference paper supplement (https://openreview.net/forum?id=OatZMyMuIo)
Supplement: supplementary_material [file attachment]

## A PROOF FOR THEOREM 3.1

*Proof.* To estimate  $p(y|\mathbf{x}, do(\mathbf{z}_s))$ , we introduce variables  $\mathbf{Z}_c$ :

$$p(y|\mathbf{x}, do(\mathbf{z}_s)) = \int_{\mathbf{z}_c} p(y|\mathbf{z}_c, \mathbf{x}, do(\mathbf{z}_s))p(\mathbf{z}_c|\mathbf{x}, do(\mathbf{z}_s)) d\mathbf{z}_c \quad (7)$$

We can simplify the calculation of  $p(y|\mathbf{z}_c, \mathbf{x}, do(\mathbf{z}_s))$  using Pearl’s Do-Calculus Rules.

$$\begin{aligned} p(y|\mathbf{z}_c, \mathbf{x}, do(\mathbf{z}_s)) &= p(y|\mathbf{z}_c, do(\mathbf{z}_s)) \quad (Y \perp\!\!\!\perp \mathbf{X} | \mathbf{Z}_c, \mathbf{Z}_s)_{\mathcal{G}_{\overline{\mathbf{Z}_s}}} \quad \text{According to Rule 1} \\ &= p(y|\mathbf{z}_c) \quad (Y \perp\!\!\!\perp \mathbf{Z}_s | \mathbf{Z}_c)_{\mathcal{G}_{\overline{\mathbf{Z}_s}}} \quad \text{According to Rule 3} \end{aligned} \quad (8)$$

We employ the Backdoor Adjustment Theorem and Pearl’s Do-Calculus Rule 2 to estimate  $p(\mathbf{z}_c|\mathbf{x}, do(\mathbf{z}_s))$ ,

$$\begin{aligned} p(\mathbf{z}_c|\mathbf{x}, do(\mathbf{z}_s)) &= \frac{p(\mathbf{z}_c|do(\mathbf{z}_s))p(\mathbf{x}|\mathbf{z}_s, do(\mathbf{z}_s))}{p(\mathbf{x}|do(\mathbf{z}_s))} \quad \text{Bayes’s Theorem} \\ &= \frac{p(\mathbf{z}_s|do(\mathbf{z}_s))p(\mathbf{x}|\mathbf{z}_c, \mathbf{z}_s)}{p(\mathbf{x}|do(\mathbf{z}_s))} \quad (\mathbf{X} \perp\!\!\!\perp \mathbf{Z}_s | \mathbf{Z}_c)_{\mathcal{G}_{\overline{\mathbf{Z}_s}}} \quad \text{According to Rule 2} \end{aligned} \quad (9)$$

Between  $\mathbf{Z}_s, \mathbf{Z}_c$ , there is a valid backdoor path from  $\mathbf{Z}_c \leftarrow Y \leftarrow \mathbf{U}_{xy} \rightarrow \mathbf{Z}_s$ , we can directly apply the Backdoor Adjustment Theorem with a valid adjusting set  $\{Y\}$ :

$$\begin{aligned} p(\mathbf{z}_c|do(\mathbf{z}_s)) &= \sum_y p(\mathbf{z}_c|y, \mathbf{z}_s)p(y) \\ &= \sum_y p(\mathbf{z}_c|y)p(y) \quad (\mathbf{Z}_c \perp\!\!\!\perp \mathbf{Z}_s | Y)_{\mathcal{G}} \\ &= p(\mathbf{z}_c) \end{aligned} \quad (10)$$

Between  $\mathbf{Z}_s, \mathbf{X}$ , there is a valid backdoor path from  $\mathbf{X} \leftarrow \mathbf{Z}_c \leftarrow Y \leftarrow \mathbf{U}_{xy} \rightarrow \mathbf{Z}_s$ . We are able to adjust on  $\{Y\}$ ,  $\{\mathbf{Z}_c\}$  or  $\{Y, \mathbf{Z}_c\}$ <sup>3</sup>. In our case, we choose to adjust on  $\{\mathbf{Z}_c\}$ :

$$p(\mathbf{x}|do(\mathbf{z}_s)) \stackrel{\text{Adjust on } \mathbf{Z}_c}{=} \int_{\mathbf{z}_c} p(\mathbf{x}|\mathbf{z}_c, \mathbf{z}_s)p(\mathbf{z}_c) d\mathbf{z}_c \quad (11)$$

Substitute Eq. equation 10, equation 11 into Eq. equation 9, we obtain:

$$p(\mathbf{z}_c|\mathbf{x}, do(\mathbf{z}_s)) = \frac{p(\mathbf{x}|\mathbf{z}_c, \mathbf{z}_s)p(\mathbf{z}_c)}{\int_{\mathbf{z}_c} p(\mathbf{x}|\mathbf{z}_c, \mathbf{z}_s)p(\mathbf{z}_c) d\mathbf{z}_c} \quad (12)$$

Substitute Eq. equation 12 and equation 8 into Eq. equation 7, we obtain Eq. equation 1 in **Theorem 3.1**:

$$\begin{aligned} p(y|\mathbf{x}, do(\mathbf{z}_s)) &= \int_{\mathbf{z}_c} p(y|\mathbf{z}_c, \mathbf{x}, do(\mathbf{z}_s))p(\mathbf{z}_c|\mathbf{x}, do(\mathbf{z}_s)) d\mathbf{z}_c \\ &= \int_{\mathbf{z}_c} p(y|\mathbf{z}_c) \frac{p(\mathbf{x}|\mathbf{z}_c, \mathbf{z}_s)p(\mathbf{z}_c)}{\int_{\mathbf{z}_c} p(\mathbf{x}|\mathbf{z}_c, \mathbf{z}_s)p(\mathbf{z}_c) d\mathbf{z}_c} d\mathbf{z}_c \end{aligned} \quad (13)$$

□

<sup>3</sup>The equations for conditioning on those three different adjusting sets are the same.

## B DERIVATIONS

### B.1 THE DERIVATION IN EQ. (2)

$$\begin{aligned}
\mathbb{E}_{p(\mathbf{z}_s|\mathbf{x})}[p(y|\mathbf{x}, do(\mathbf{z}_s))] &= \mathbb{E}_{p(\mathbf{z}_s|\mathbf{x})}\left[\frac{\int_{\mathbf{z}_c} p(y|\mathbf{z}_c)p(\mathbf{x}|\mathbf{z}_c, \mathbf{z}_s)p(\mathbf{z}_c) d\mathbf{z}_c}{\int_{\mathbf{z}_c} p(\mathbf{x}|\mathbf{z}_c, \mathbf{z}_s)p(\mathbf{z}_c) d\mathbf{z}_c}\right] \\
&\approx \frac{1}{N} \sum_{n=1}^N \left[ \sum_{l=1}^L p(y|\mathbf{z}_{c,l}) \frac{p(\mathbf{x}|\mathbf{z}_{c,l}, \mathbf{z}_{s,n})}{\sum_{l'=1}^L p(\mathbf{x}|\mathbf{z}_{c,l'}, \mathbf{z}_{s,n})} \right], \mathbf{z}_{c,l} \sim p(\mathbf{z}_c), \mathbf{z}_{s,n} \sim p(\mathbf{z}_s|\mathbf{x}) \\
&= \frac{1}{N} \sum_{n=1}^N \left[ \sum_{l=1}^L p(y|\mathbf{z}_{c,l}) \omega(\mathbf{z}_{c,l}, \mathbf{z}_{s,n}) \right], \text{ where } \omega(\mathbf{z}_{c,l}, \mathbf{z}_{s,n}) = \frac{p(\mathbf{x}|\mathbf{z}_{c,l}, \mathbf{z}_{s,n})}{\sum_{l'=1}^L p(\mathbf{x}|\mathbf{z}_{c,l'}, \mathbf{z}_{s,n})}
\end{aligned} \tag{14}$$

### B.2 THE DERIVATION OF THE MARGINAL LIKELIHOOD IN EQ. (4)

We character the joint likelihood over the variables in the proposed SCM. However, there are 6 variables of interest and only the observations for 2 of them are available. Therefore, we start from the marginal likelihood  $p(\mathbf{x}, y)$ .

$$\begin{aligned}
&\log p(\mathbf{x}, y) \\
&= \log \int_{\mathbf{z}_c} \int_{\mathbf{z}_s} \sum_{u_x} \sum_{u_{xy}} p(u_x, u_{xy}, \mathbf{z}_s, \mathbf{z}_c, \mathbf{x}, y) d\mathbf{z}_c d\mathbf{z}_s \\
&= \log \int_{\mathbf{z}_c} \int_{\mathbf{z}_s} \sum_{u_x} \sum_{u_{xy}} p(u_x)p(u_{xy})p(\mathbf{z}_s|u_x, u_{xy})p(y|u_{xy})p(\mathbf{z}_c|y)p(\mathbf{x}|\mathbf{z}_s, \mathbf{z}_c) d\mathbf{z}_c d\mathbf{z}_s \quad \text{Bayesian Network Chain Rule} \\
&= \log \frac{1}{p(y)} \int_{\mathbf{z}_c} \int_{\mathbf{z}_s} \sum_{u_x} \sum_{u_{xy}} p(u_x)p(u_{xy})p(\mathbf{z}_s|u_x, u_{xy})p(y|u_{xy})p(y|\mathbf{z}_c)p(\mathbf{z}_c)p(\mathbf{x}|\mathbf{z}_s, \mathbf{z}_c) d\mathbf{z}_c d\mathbf{z}_s \quad \text{Bayes Theorem} \\
&= \log \frac{1}{p(y)} + \log \int_{\mathbf{z}_c} \int_{\mathbf{z}_s} \sum_{u_x} \sum_{u_{xy}} p(u_x)p(u_{xy})p(\mathbf{z}_s|u_x, u_{xy})p(y|u_{xy})p(y|\mathbf{z}_c)p(\mathbf{z}_c)p(\mathbf{x}|\mathbf{z}_s, \mathbf{z}_c) d\mathbf{z}_c d\mathbf{z}_s \\
&\geq \log \int_{\mathbf{z}_c} \int_{\mathbf{z}_s} \left[ \sum_{u_x} \sum_{u_{xy}} p(u_x)p(u_{xy})p(\mathbf{z}_s|u_x, u_{xy})p(y|u_{xy}) \right] p(y|\mathbf{z}_c)p(\mathbf{z}_c)p(\mathbf{x}|\mathbf{z}_s, \mathbf{z}_c) d\mathbf{z}_c d\mathbf{z}_s \\
&= \log \int_{\mathbf{z}_c} \int_{\mathbf{z}_s} \left[ \sum_{u_x} \sum_{u_{xy}} p(u_x|u_{xy})p(u_{xy})p(\mathbf{z}_s|u_x, u_{xy})p(y|u_{xy}) \right] p(y|\mathbf{z}_c)p(\mathbf{z}_c)p(\mathbf{x}|\mathbf{z}_s, \mathbf{z}_c) d\mathbf{z}_c d\mathbf{z}_s \quad U_x \perp\!\!\!\perp U_{xy} \\
&= \log \int_{\mathbf{z}_c} \int_{\mathbf{z}_s} \frac{\left[ \sum_{u_{xy}} p(u_{xy})p(\mathbf{z}_s|u_{xy})p(y|u_{xy}) \right] p(y|\mathbf{z}_c)p(\mathbf{z}_c)p(\mathbf{x}|\mathbf{z}_s, \mathbf{z}_c)}{q(\mathbf{z}_s, \mathbf{z}_c|\mathbf{x})} q(\mathbf{z}_s, \mathbf{z}_c|\mathbf{x}) d\mathbf{z}_c d\mathbf{z}_s \\
&= \log \mathbb{E}_{q(\mathbf{z}_s, \mathbf{z}_c|\mathbf{x})} \left[ \frac{\left[ \sum_{u_{xy}} p(u_{xy})p(\mathbf{z}_s|u_{xy})p(y|u_{xy}) \right] p(y|\mathbf{z}_c)p(\mathbf{z}_c)p(\mathbf{x}|\mathbf{z}_s, \mathbf{z}_c)}{q(\mathbf{z}_s, \mathbf{z}_c|\mathbf{x})} \right] \\
&= \log \mathbb{E}_{q(\mathbf{z}_s, \mathbf{z}_c|\mathbf{x})} \left[ \frac{\left[ \sum_{u_{xy}} p(u_{xy})p(\mathbf{z}_s|u_{xy})p(y|u_{xy}) \right] p(y|\mathbf{z}_c)p(\mathbf{z}_c)p(\mathbf{x}|\mathbf{z}_s, \mathbf{z}_c)}{q(\mathbf{z}_s|\mathbf{x})q(\mathbf{z}_c|\mathbf{x})} \right] \quad \text{Assume } q(\mathbf{z}_s, \mathbf{z}_c|\mathbf{x}) = q(\mathbf{z}_s|\mathbf{x})q(\mathbf{z}_c|\mathbf{x}) \\
&\geq \mathbb{E}_{q(\mathbf{z}_s, \mathbf{z}_c|\mathbf{x})} \log \left[ \frac{\left[ \sum_{u_{xy}} p(u_{xy})p(\mathbf{z}_s|u_{xy})p(y|u_{xy}) \right] p(\mathbf{z}_c)}{q(\mathbf{z}_s|\mathbf{x})q(\mathbf{z}_c|\mathbf{x})} p(y|\mathbf{z}_c)p(\mathbf{x}|\mathbf{z}_s, \mathbf{z}_c) \right] \quad \text{Jensen's inequality} \\
&= \mathbb{E}_{q(\mathbf{z}_s, \mathbf{z}_c|\mathbf{x})} \left[ \log \frac{\left[ \sum_{u_{xy}} p(u_{xy})p(\mathbf{z}_s|u_{xy})p(y|u_{xy}) \right]}{q(\mathbf{z}_s|\mathbf{x})} + \log \frac{p(\mathbf{z}_c)}{q(\mathbf{z}_c|\mathbf{x})} + \log p(y|\mathbf{z}_c) + \log p(\mathbf{x}|\mathbf{z}_s, \mathbf{z}_c) \right] \\
&= \mathbb{E}_{q(\mathbf{z}_s|\mathbf{x})} \log \frac{\sum_{u_{xy}} p(u_{xy})p(\mathbf{z}_s|u_{xy})p(y|u_{xy})}{q(\mathbf{z}_s|\mathbf{x})} + \mathbb{E}_{q(\mathbf{z}_c|\mathbf{x})} \log \frac{p(\mathbf{z}_c)}{q(\mathbf{z}_c|\mathbf{x})} + \mathbb{E}_{q(\mathbf{z}_c|\mathbf{x})} \log p(y|\mathbf{z}_c) + \mathbb{E}_{q(\mathbf{z}_c, \mathbf{z}_s|\mathbf{x})} \log p(\mathbf{x}|\mathbf{z}_c, \mathbf{z}_s) \\
&= \mathbb{E}_{q(\mathbf{z}_s|\mathbf{x})} \log \frac{\sum_{u_{xy}} p(u_{xy})p(\mathbf{z}_s|u_{xy})p(y|u_{xy})}{q(\mathbf{z}_s|\mathbf{x})} - KL(q(\mathbf{z}_c|\mathbf{x})||p(\mathbf{z}_c)) + \mathbb{E}_{q(\mathbf{z}_c|\mathbf{x})} \log p(y|\mathbf{z}_c) + \mathbb{E}_{q(\mathbf{z}_c, \mathbf{z}_s|\mathbf{x})} \log p(\mathbf{x}|\mathbf{z}_c, \mathbf{z}_s)
\end{aligned} \tag{15}$$

We further simplify the first term as follows,

$$\begin{aligned}
& \mathbb{E}_{q(\mathbf{z}_s|\mathbf{x})} \log \left[ \frac{\sum_{u_{xy}} p(u_{xy})p(\mathbf{z}_s|u_{xy})p(y|u_{xy})}{q(\mathbf{z}_s|\mathbf{x})} \right] \\
&= \mathbb{E}_{q(\mathbf{z}_s|\mathbf{x})} \log \left[ \sum_{u_{xy}} \frac{p(\mathbf{z}_s|u_{xy})p(y|u_{xy})}{q(\mathbf{z}_s|\mathbf{x})} p(u_{xy}) \right] \\
&= \mathbb{E}_{q(\mathbf{z}_s|\mathbf{x})} \log \mathbb{E}_{p(u_{xy})} \frac{p(\mathbf{z}_s|u_{xy})p(y|u_{xy})}{q(\mathbf{z}_s|\mathbf{x})} \\
&\geq \mathbb{E}_{q(\mathbf{z}_s|\mathbf{x})} \mathbb{E}_{p(u_{xy})} \log \left[ \frac{p(\mathbf{z}_s|u_{xy})p(y|u_{xy})}{q(\mathbf{z}_s|\mathbf{x})} \right] \quad \text{Jensen's inequality} \\
&= \mathbb{E}_{q(\mathbf{z}_s|\mathbf{x})} \mathbb{E}_{p(u_{xy})} \left[ \log \frac{p(\mathbf{z}_s|u_{xy})}{q(\mathbf{z}_s|\mathbf{x})} + \log p(y|u_{xy}) \right] \\
&= \mathbb{E}_{p(u_{xy})} \mathbb{E}_{q(\mathbf{z}_s|\mathbf{x})} \left[ \log \frac{p(\mathbf{z}_s|u_{xy})}{q(\mathbf{z}_s|\mathbf{x})} \right] + \mathbb{E}_{p(u_{xy})} \log p(y|u_{xy}) \\
&= \mathbb{E}_{p(u_{xy})} \mathbb{E}_{q(\mathbf{z}_s|\mathbf{x})} \left[ \log \frac{\sum_{u_x} p(\mathbf{z}_s|u_x, u_{xy})p(u_x|u_{xy})}{q(\mathbf{z}_s|\mathbf{x})} \right] + \mathbb{E}_{p(u_{xy})} \log p(y|u_{xy}) \quad \text{Re-introduce } U_x \\
&= \mathbb{E}_{p(u_{xy})} \mathbb{E}_{q(\mathbf{z}_s|\mathbf{x})} \left[ \log \sum_{u_x} \frac{p(\mathbf{z}_s|u_x, u_{xy})}{q(\mathbf{z}_s|\mathbf{x})} p(u_x) \right] + \mathbb{E}_{p(u_{xy})} \log p(y|u_{xy}) \quad U_x \perp\!\!\!\perp U_{xy} \\
&= \mathbb{E}_{p(u_{xy})} \mathbb{E}_{q(\mathbf{z}_s|\mathbf{x})} \left[ \log \mathbb{E}_{p(u_x)} \frac{p(\mathbf{z}_s|u_x, u_{xy})}{q(\mathbf{z}_s|\mathbf{x})} \right] + \mathbb{E}_{p(u_{xy})} \log p(y|u_{xy}) \\
&\geq \mathbb{E}_{p(u_{xy})} \mathbb{E}_{p(u_x)} \mathbb{E}_{q(\mathbf{z}_s|\mathbf{x})} \left[ \log \frac{p(\mathbf{z}_s|u_x, u_{xy})}{q(\mathbf{z}_s|\mathbf{x})} \right] + \mathbb{E}_{p(u_{xy})} \log p(y|u_{xy}) \quad \text{Jensen's inequality} \\
&= -\mathbb{E}_{p(u_x)} \mathbb{E}_{p(u_{xy})} KL(q(\mathbf{z}_s|\mathbf{x})||p(\mathbf{z}_s|u_x, u_{xy})) + \mathbb{E}_{p(u_{xy})} \log p(y|u_{xy}) \\
&= -\mathbb{E}_{p(u_x, u_{xy})} KL(q(\mathbf{z}_s|\mathbf{x})||p(\mathbf{z}_s|u_x, u_{xy})) + \mathbb{E}_{p(u_{xy})} \log p(y|u_{xy})
\end{aligned} \tag{16}$$

We parameterize the encoder distributions using parameter  $\Theta = \{\Theta_s, \Theta_c\}$ , denoted as  $q_{\Theta_s}(\mathbf{z}_s|\mathbf{x})$  and  $q_{\Theta_c}(\mathbf{z}_c|\mathbf{x})$ , the decoder distribution with parameter  $\Phi$  as  $p_{\Phi}(\mathbf{x}|\mathbf{z}_c, \mathbf{z}_s)$ , and the classifier distribution with parameter  $\Psi$  as  $p_{\Psi}(y|\mathbf{z}_c)$ . During training, we optimize these defined parameters to construct the corresponding distributions. Additionally, we make assumptions or estimations about the prior distributions, specifically  $p(\mathbf{z}_c)$  and  $p(\mathbf{z}_s|u_x, u_{xy})$ , to help regularize the learning of representations. Notably, we do not parameterize over  $p(y|u_{xy})$ , as it is not necessary for either obtaining representations or computing interventional distributions. As a result, we omit the term  $\mathbb{E}_{p(u_{xy})} \log p(y|u_{xy})$ , as it is independent of the parameters for optimization. By combining Eq.(15) with Eq.(16), we propose the following training objective for the causal representation learning procedure:

$$\begin{aligned}
\mathcal{L}_{obj}(\mathbf{x}, y, \Theta, \Phi, \Psi) &= -\mathbb{E}_{p(u_x, u_{xy})} KL(q_{\Theta_s}(\mathbf{z}_s|\mathbf{x})||p(\mathbf{z}_s|u_x, u_{xy})) - KL(q_{\Theta_c}(\mathbf{z}_c|\mathbf{x})||p(\mathbf{z}_c)) \\
&\quad + \mathbb{E}_{q_{\Theta_c}(\mathbf{z}_c|\mathbf{x})} \log p_{\Psi}(y|\mathbf{z}_c) + \mathbb{E}_{q_{\Theta}(\mathbf{z}_c, \mathbf{z}_s|\mathbf{x})} \log p_{\Phi}(\mathbf{x}|\mathbf{z}_c, \mathbf{z}_s)
\end{aligned} \tag{17}$$

## C EMPIRICAL ABLATION STUDY

In this section, we perform three ablation studies: 1) We show the sensitivity of our proposed CRLII method with respect to the value of  $|U|$  that we specify during SCM parameterization and learning. 2) We demonstrate the necessity of our intervention inference approach due to the imperfect disentanglement between  $\mathbf{z}_s$  and  $\mathbf{z}_c$ . 3) We provide a detailed approach to choose the number of  $\mathbf{z}_{c,l}$  that we need to obtain to perform interventional inference.

### C.1 THE NUMBER OF DOMAINS

In this section, we explore how varying the number of domains  $|U|$  affects out-of-distribution (OOD) prediction performance. We incrementally increase the values of  $|U|$  from 1 to 5 and present the corresponding prediction performance in Figure 5.

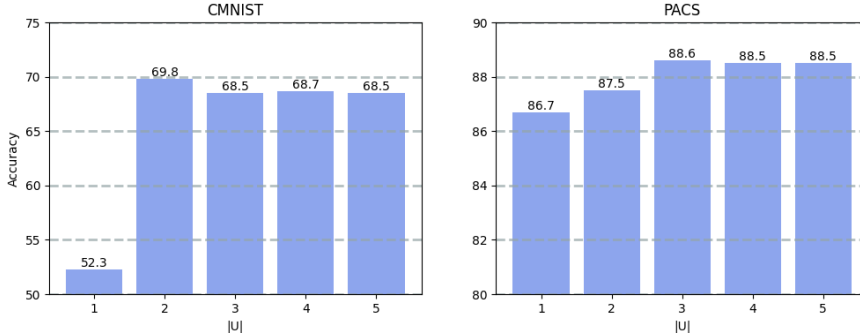

Figure 5: Ablation study on the influence from the number of domains  $|U|$ . The results on PACS dataset are averaged over four domains.

The findings from Figure 5 reveal that our method exhibits its poorest performance when the number of domains, denoted as  $|U|$ , is set to 1. In such a scenario, the assumption is made that  $z_s$  follows a Gaussian distribution, and its prior distribution mirrors that of  $z_c$ . This results in a compromise in the asymmetry regularization between the two types of representations, leading to suboptimal disentanglement. The restoration of this asymmetry occurs when we set  $|U| \geq 2$ . However, performance results appear comparable for cases where  $|U|$  exceeds 2. The optimal selection of  $|U|$  hinges on the dissimilarities between the true data distributions across each domain. In situations involving observational datasets lacking domain-specific information, setting  $|U| = 2$  can still yield a reasonably well-disentangled set of representations.

### C.2 INFLUENCE OF INTERVENTIONAL INFERENCE

In Section 4.1, we provide theoretical justification for our choice of interventional inference, driven by the partial disentanglement observed between  $z_c$  and  $z_s$  during the SCM learning process. In Table 4, our empirical results demonstrate that the  $z_c$  representation we obtain still retains information from  $z_s$ . Consequently, interventional inference proves effective in further enhancing OOD performance when compared to direct prediction using  $p(y|z_c^t)$ , where  $z_c^t = \arg \max_{z_c} q(z_c|x^t)$ .

Table 4: Comparison between prediction and interventional inference.

| Datasets   | Accuracy (%)          |                          |
|------------|-----------------------|--------------------------|
|            | Prediction with $z_c$ | Interventional Inference |
| CMNIST     | 52.6                  | <b>69.8</b>              |
| PACS       | 86.7                  | <b>88.6</b>              |
| VLCS       | 76.3                  | <b>79.1</b>              |
| OfficeHome | 67.7                  | <b>69.5</b>              |

### C.3 THE SELECTION OF $L$

For the purpose of inference, we generated a set of  $z_c$  samples from the training inputs and computed their weighted sum for  $p(y|z_c)$ . However, this process proved to be time-consuming and inefficient, especially when dealing with a large number of training inputs. We observed significant variation in the magnitudes of weights assigned to different samples of  $z_c$ . Let's denote the obtained samples as  $z_{c,1}, z_{c,2}, \dots, z_{c,L}$ , with  $\omega(z_{c,1}, z_{s,n}) \geq \omega(z_{c,2}, z_{s,n}) \geq \dots \geq \omega(z_{c,L}, z_{s,n})$ . Notably, when  $L > 5$ , the ratio  $\frac{\omega(z_{c,1}, z_{s,n})}{\omega(z_{c,L}, z_{s,n})}$  exceeds 10, and when  $L > 10$ , it surpasses 100. In cases where  $\omega(z_{c,1}, z_{s,n}) > 100\omega(z_{c,L}, z_{s,n})$ , the contribution of  $\omega(z_{c,L}, z_{s,n})$  to the weighted sum becomes negligible. Consequently, it becomes unnecessary to consider values of  $L$  greater than 10.
